# Supplementary material for: Review – Safety Aspects of Sodium-Ion Batteries: Prospective Analysis from 1st Generation towards More Advanced Systems
Source: Preprints.org preprint supplement (doi:10.20944/preprints202407.2601.v1), 2024-07-31
Supplement: Supplementary file 2 [file supplementary]

***Supplementary Information***

**Review - Safety aspects of sodium-ion batteries: Prospective analysis from 1st generation towards more advanced systems**

Pempa Tshering Bhutia1,2,3,4, Sylvie Grugeon2,3, Asmae El Mejdoubi5, Stéphane Laruelle2,3, Guy Marlair1,***

*1InstitutNational de l’Environnement Industriel et des Risques (INERIS), Parc Technologique Alata, BP2, 60550 Verneuil-en-Halatte, France*

*2Laboratoire de Réactivité et Chimie des Solides, CNRS UMR 7314, Université de Picardie Jules Verne, Amiens 80039, France*

*3RS2E, Réseau Français sur le Stockage Electrochimique de l’Energie, FR CNRS 3459, CEDEX 1, F-80039 Amiens, France*

*4Alistore-European Research Institute (ERI), FR CNRS 3104, F-80039 Amiens Cedex 1, France*

*5TIAMAT, 72 rue des Jacobins, 80000 Amiens, France*

**Corresponding author:* [*Guy.MARLAIR@ineris.fr*](mailto:Guy.MARLAIR@ineris.fr)

Table S1: Theoretical and Practical capacity of selected materials reported in main paper

| ***Materials*** | ***Theoretical capacity (mAh/g)*** | ***Practical capacity***  ***(mAh/g)*** | ***Sources*** |
| --- | --- | --- | --- |
| ***Cathode:*** |  |  |  |
| LiCoO2 | 274 | 140-170 typically,  190 (dopants) | [1] |
| LiNiO2 | 275 | 180-200 typically,  232 (Best performance) | [2] |
| LiMnO2 | 285 | 210 | [3] |
| LiNi0.33Mn0.33Co0.33O2 | 280 | 164 | [4] |
| LiMn2O4 | 148 | 140 | [5] |
| LiFePO4 | 170 | 192 (modified LFP-microrods/multi-walled carbon nanotube) | [6] |
|  |  |  |  |
| Na3V2(PO4)2 | 128 | 120 | [7] |
| NaFeO2 | 242 | 103 | [8] |
| Na2FeP2O7 | 97 | 90 | [9] |
| Na3.32Fe2.11Ca0.23(P2O7)2 | 148 | 100 | [10] |
| Na0.69CoO2 | 173 | 147 (Na0.12CoO2),  116 (Na0.24CoO2),  49 (Na0.52CoO2) | [11] |
| Na0.44MnO2 | 121 | 108 | [12] |
| NaNi0.33Fe0.33Mn0.33O2 | 282 | 165 | [13] |
| Na0.9[Cu0.22Fe0.30Mn0.48]O2 | 220 | 100 | [14] |
| Na[Ni0.6Co0.2Mn0.2]O2 | 276 | 153 | [15] |
|  |  |  |  |
| ***Anode:*** |  |  |  |
| Graphite | 372 | 348 | [16] |
| Li4Ti5O12 | 175 | 160 | [17] |
|  |  |  |  |
| Hard carbon | Precursors dependent | 361 | [18] |

Table S2: Selected commercial (start-ups) level sodium-ion batteries

| ***Company*** | ***Active Materials*** |
| --- | --- |
| Contemporary Amperex Technology Co., Ltd. (CATL) | Prussian blue analog material||HC |
| Faradion Limited | Layered oxide materials||HC |
| HiNa Battery Technology Co., Ltd. | NaCu1-y-zFeyMnzO2||HC |
| Natron Energy | Prussian blue analog material||HC |
| TIAMAT | Polyanionic material || HC |
| Novasis Energies | Prussian blue analog material||HC |
| Altris AB | Prussian blue analog material||HC |
| Aquion Energy | Mn-oxide intercalation cathode||High-capacity activated anode |

**References:**

1. Liu, Q.; Su, X.; Lei, D.; Qin, Y.; Wen, J.; Guo, F.; Wu, Y.A.; Rong, Y.; Kou, R.; Xiao, X.; et al. Approaching the Capacity Limit of Lithium Cobalt Oxide in Lithium Ion Batteries via Lanthanum and Aluminium Doping. *Nat Energy* **2018**, *3*, 936–943, doi:10.1038/s41560-018-0180-6.

2. Välikangas, J.; Laine, P.; Hietaniemi, M.; Hu, T.; Tynjälä, P.; Lassi, U. Precipitation and Calcination of High-Capacity LiNiO2 Cathode Material for Lithium-Ion Batteries. *Applied Sciences* **2020**, *10*, 8988, doi:10.3390/app10248988.

3. Myung, S.-T.; Komaba, S.; Kumagai, N. Orthorhombic LiMnO2 as a High Capacity Cathode for Lithium-Ion Battery Synthesized by Hydrothermal Route at 170 °C. *Chemistry Letters* **2001**, *30*, 80–81, doi:10.1246/cl.2001.80.

4. Wagner, A.C.; Bohn, N.; Geßwein, H.; Neumann, M.; Osenberg, M.; Hilger, A.; Manke, I.; Schmidt, V.; Binder, J.R. Hierarchical Structuring of NMC111-Cathode Materials in Lithium-Ion Batteries: An In-Depth Study on the Influence of Primary and Secondary Particle Sizes on Electrochemical Performance. *ACS Appl. Energy Mater.* **2020**, *3*, 12565–12574, doi:10.1021/acsaem.0c02494.

5. Taddesse, P.; Gebrekiros, H.; Semu, G.; Duressa, M.; Chemeda, Y.C.; Murali, N.; Babu, K.V. Investigation of Structural, Vibrational Spectroscopic and Properties Study of LiMn2O4 and LiMn1.9Cu0.05Fe0.05O4 Cathode Materials. *Results in Materials* **2021**, *12*, 100224, doi:10.1016/j.rinma.2021.100224.

6. Kanagaraj, A.B.; Chaturvedi, P.; Kim, H.J.; Choi, D.S. Controllable Synthesis of LiFePO4 Microrods and Its Superior Electrochemical Performance. *Materials Letters* **2021**, *283*, 128737, doi:10.1016/j.matlet.2020.128737.

7. Desai, P.; Forero-Saboya, J.; Meunier, V.; Rousse, G.; Deschamps, M.; Abakumov, A.M.; Tarascon, J.-M.; Mariyappan, S. Mastering the Synergy between Na3V2(PO4)2F3 Electrode and Electrolyte: A Must for Na-Ion Cells. *Energy Storage Materials* **2023**, *57*, 102–117, doi:10.1016/j.ensm.2023.02.004.

8. Zhao, J.; Zhao, L.; Dimov, N.; Okada, S.; Nishida, T. Electrochemical and Thermal Properties of α-NaFeO 2 Cathode for Na-Ion Batteries. *J. Electrochem. Soc.* **2013**, *160*, A3077–A3081, doi:10.1149/2.007305jes.

9. Barpanda, P.; Liu, G.; Ling, C.D.; Tamaru, M.; Avdeev, M.; Chung, S.-C.; Yamada, Y.; Yamada, A. Na 2 FeP 2 O 7 : A Safe Cathode for Rechargeable Sodium-Ion Batteries. *Chem. Mater.* **2013**, *25*, 3480–3487, doi:10.1021/cm401657c.

10. Liu, Y.; Wu, Z.; Indris, S.; Hua, W.; Casati, N.P.M.; Tayal, A.; Darma, M.S.D.; Wang, G.; Liu, Y.; Wu, C.; et al. The Structural Origin of Enhanced Stability of Na3.32Fe2.11Ca0.23(P2O7)2 Cathode for Na-Ion Batteries. *Nano Energy* **2021**, *79*, 105417, doi:10.1016/j.nanoen.2020.105417.

11. Hwang, S.; Lee, Y.; Jo, E.; Chung, K.Y.; Choi, W.; Kim, S.M.; Chang, W. Investigation of Thermal Stability of P2–Na *x* CoO 2 Cathode Materials for Sodium Ion Batteries Using Real-Time Electron Microscopy. *ACS Appl. Mater. Interfaces* **2017**, *9*, 18883–18888, doi:10.1021/acsami.7b04478.

12. Feng, J.; An, Y.; Ci, L.; Xiong, S. Nonflammable Electrolyte for Safer Non-Aqueous Sodium Batteries. *J. Mater. Chem. A* **2015**, *3*, 14539–14544, doi:10.1039/C5TA03548A.

13. Xie, Y.; Xu, G.-L.; Che, H.; Wang, H.; Yang, K.; Yang, X.; Guo, F.; Ren, Y.; Chen, Z.; Amine, K.; et al. Probing Thermal and Chemical Stability of Na *x* Ni 1/3 Fe 1/3 Mn 1/3 O 2 Cathode Material toward Safe Sodium-Ion Batteries. *Chem. Mater.* **2018**, *30*, 4909–4918, doi:10.1021/acs.chemmater.8b00047.

14. Li, Y.; Hu, Y.-S.; Qi, X.; Rong, X.; Li, H.; Huang, X.; Chen, L. Advanced Sodium-Ion Batteries Using Superior Low Cost Pyrolyzed Anthracite Anode: Towards Practical Applications. *Energy Storage Materials* **2016**, *5*, 191–197, doi:10.1016/j.ensm.2016.07.006.

15. Hwang, J.-Y.; Myung, S.-T.; Choi, J.U.; Yoon, C.S.; Yashiro, H.; Sun, Y.-K. Resolving the Degradation Pathways of the O3-Type Layered Oxide Cathode Surface through the Nano-Scale Aluminum Oxide Coating for High-Energy Density Sodium-Ion Batteries. *J. Mater. Chem. A* **2017**, *5*, 23671–23680, doi:10.1039/C7TA08443A.

16. Endo, K.; Zhang, H.P.; Fu, L.J.; Lee, K.J.; Sekine, K.; Takamura, T.; Jeong, Y.U.; Wu, Y.P.; Holze, R.; Wu, H.Q. Electrochemical Performance of a Novel Surface Modified Spherical Graphite as Anode Material for Lithium Ion Batteries. *J Appl Electrochem* **2006**, *36*, 1307–1310, doi:10.1007/s10800-006-9177-0.

17. Shu, J. Electrochemical Behavior and Stability of Li4Ti5O12 in a Broad Voltage Window. *J Solid State Electrochem* **2009**, *13*, 1535–1539, doi:10.1007/s10008-008-0723-z.

18. Xiao, L.; Lu, H.; Fang, Y.; Sushko, M.L.; Cao, Y.; Ai, X.; Yang, H.; Liu, J. Low‐Defect and Low‐Porosity Hard Carbon with High Coulombic Efficiency and High Capacity for Practical Sodium Ion Battery Anode. *Advanced Energy Materials* **2018**, *8*, 1703238, doi:10.1002/aenm.201703238.
